# Supplementary material for: Synthesis, structure, and antimicrobial activity of a series of novel heterocyclic azo-colorants derived from α-dicarbonyl compounds
Source: Royal Society of Chemistry journal article supplement (doi:10.1039/d5ra10033j), 2026-05-08
Supplement: d5ra10033j1.pdf [file d5ra10033j1.pdf]

SYNTHESIS, STRUCTURE, AND ANTIMICROBAL ACTIVITY OF A SERIES OF NOVEL  
HETEROCYCLIC AZO-COLORANTS DERIVED FROM  $\alpha$ -DICARBONYL COMPOUNDS

Thi Ngoc Anh Vu<sup>1,2</sup>, Nadezhda Polyanskaya<sup>3,4,5</sup>, Svetlana Bozhenkova<sup>4</sup>, Viktor Khrustalev<sup>3,6</sup>,  
Andrey Utenyshev<sup>4,7</sup>, Anton Shetnev<sup>8</sup>, Igor Filenko<sup>9</sup>, Minh Chin Huynh<sup>10</sup>, Anh Nguyen Van<sup>11</sup>,  
Olga Kovalchukova<sup>3,4</sup>

<sup>1</sup> *Laboratory of Advanced Materials Chemistry, Institute for Advanced Study in Technology, Ton Duc Thang University, Ho Chi Minh City, Vietnam*

<sup>2</sup> *Faculty of Applied Sciences, Ton Duc Thang University, Ho Chi Minh City, Viet Nam*

<sup>3</sup> *Peoples' Friendship University of Russia (RUDN University), 6, Miklukho-Maklaya Str., Moscow 117197, Russia*

<sup>4</sup> *A.N. Kosygin Russian State University, 1-3, Malaya Kaluzhskaya Str., Moscow 117997, Russia*

<sup>5</sup> *Petrovsky Medical University, 3, Tsuriupy Str., Moscow 117418, Russia*

<sup>6</sup> *Zelinsky Institute of Organic Chemistry of RAS, 47 Leninsky Prospect, 119991 Moscow, Russian Federation*

<sup>7</sup> *Federal Research Center of Problem of Chemical Physics and Medicinal Chemistry RAS, 1, Academician Semenov Avenue, Chernogolovka, Moscow Region, 142432, Russia*

<sup>8</sup> *Yaroslavl State Pedagogical University named after K.D.Ushinsky, 108, Respublikanskaya Str., Yaroslavl, 150000, Russia*

<sup>9</sup> *Russian Institute for Scientific and Technical Information (VINITI RAS), 20, Usievich Str., Moscow, 125315, Russia*

<sup>10</sup> *Ho Chi Minh City Department of Health, Ho Chi Minh City, 700000, Vietnam.*

<sup>11</sup> *Faculty of Food Science and Technology, Ho Chi Minh City University of Industry and Trade, Ho Chi Minh City, 700000, Vietnam*

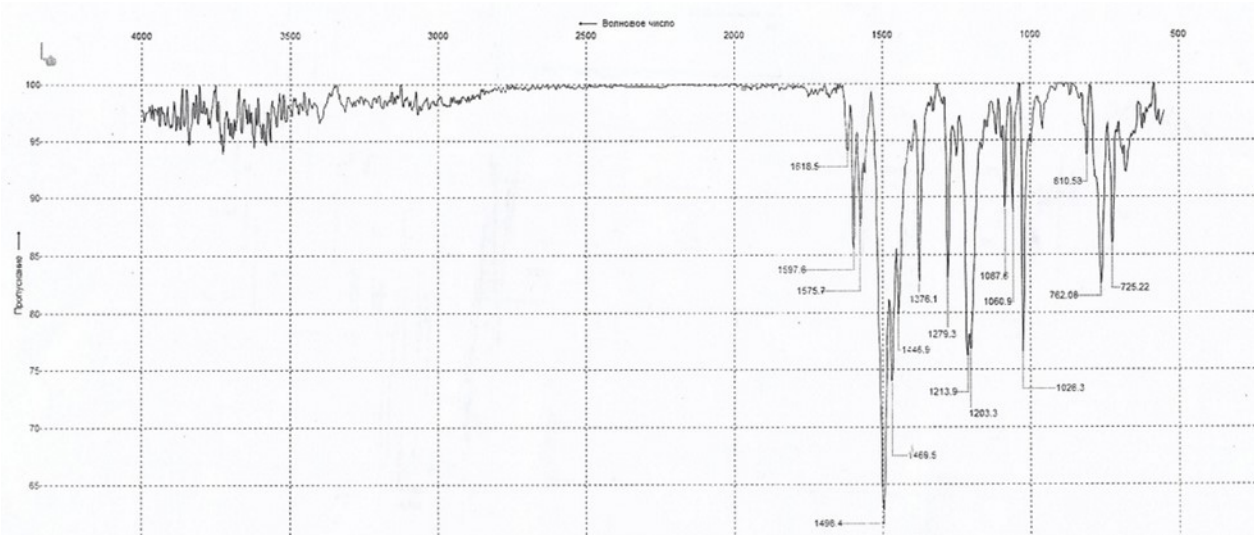

Fig 1S. IR Spectrum of L<sup>1</sup>

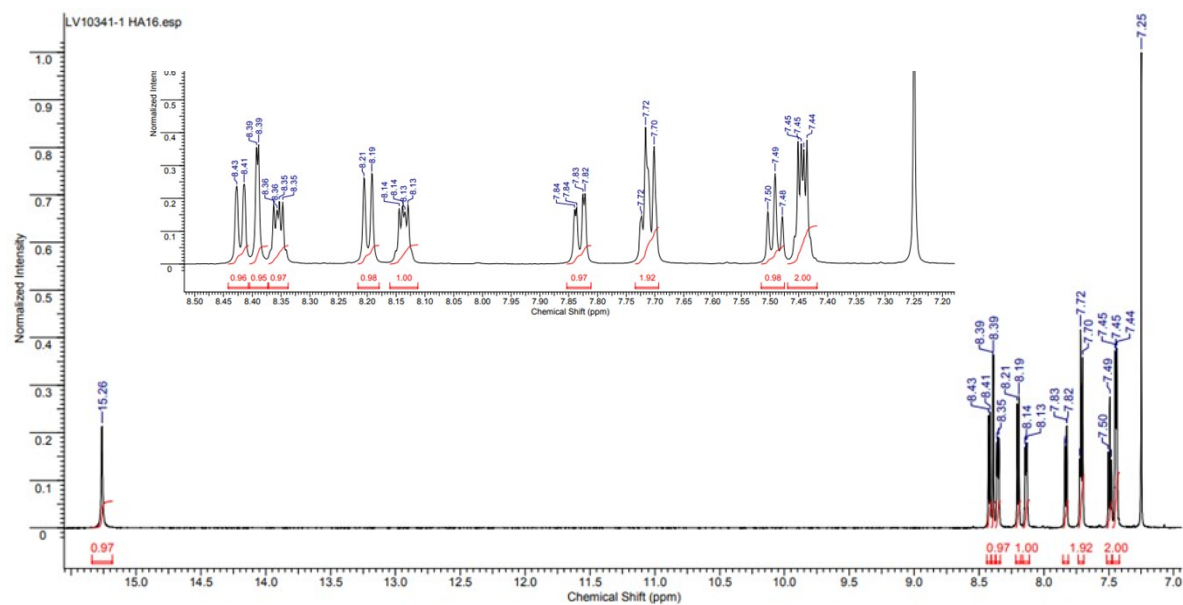

Fig 2S. <sup>1</sup>H NMR spectrum of L<sup>1</sup>

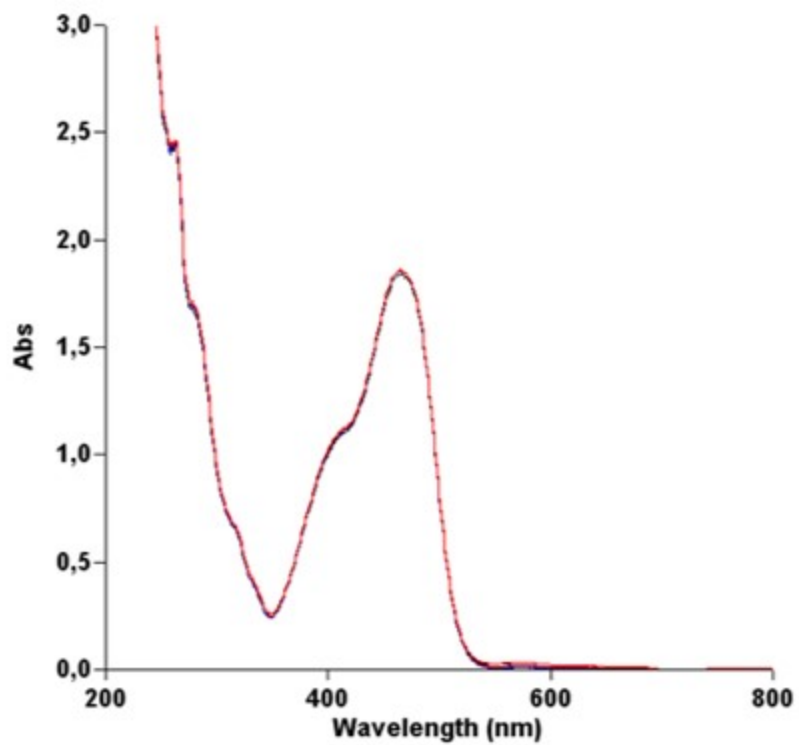

Fig 3S. UV-Vis spectrum of L<sup>1</sup> in ethanol

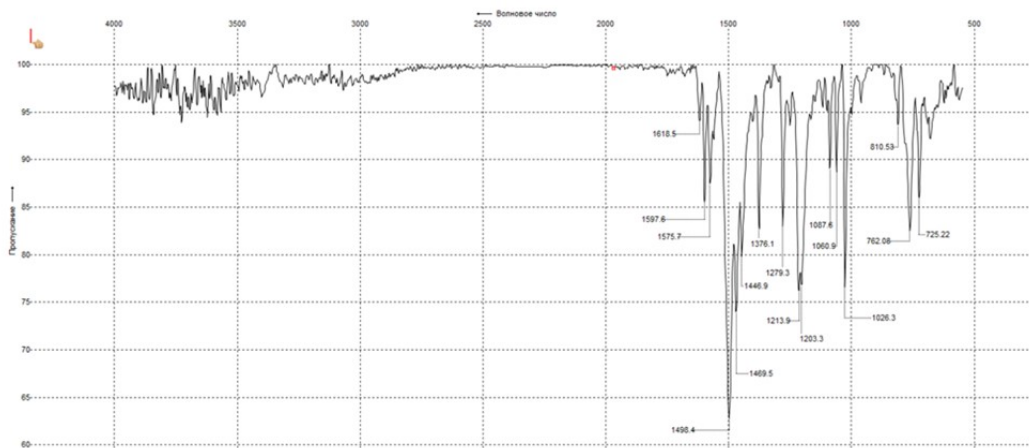

Fig 4. IR spectrum of L<sup>3</sup>

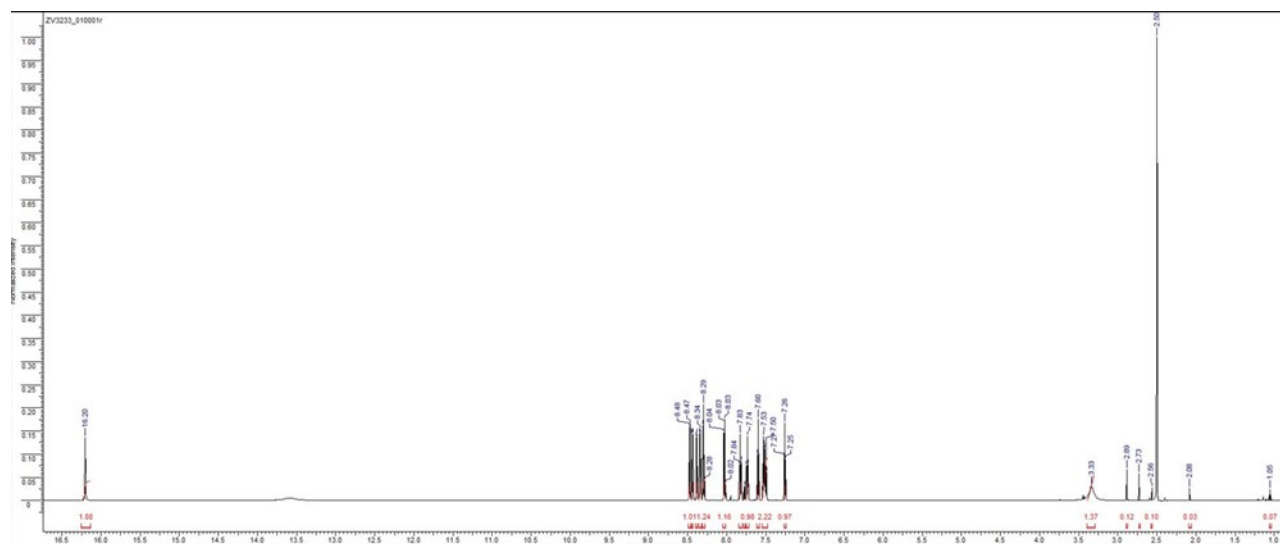

Fig 5.  $^1\text{H}$  NMR spectrum of  $\text{L}^4$

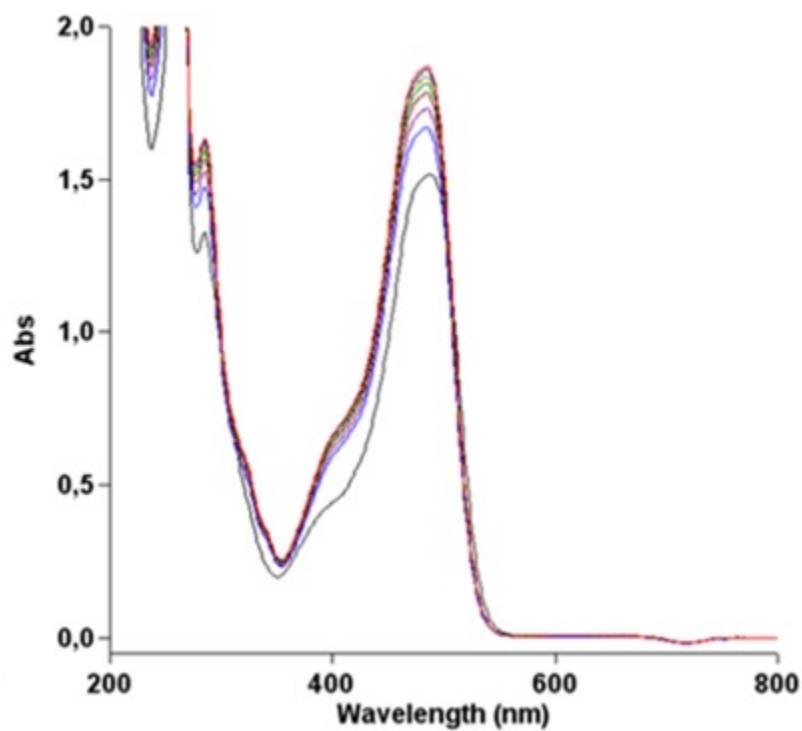

Fig 6: UV-Vis spectrum of  $\text{L}^3$

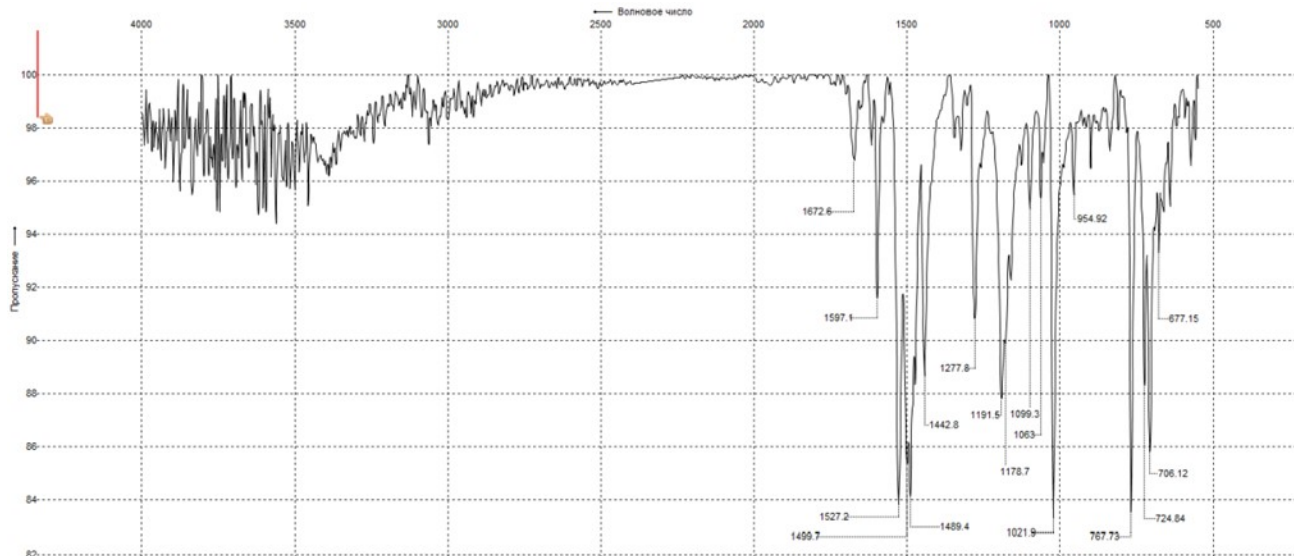

Fig 7S. IR spectrum of L<sup>4</sup>

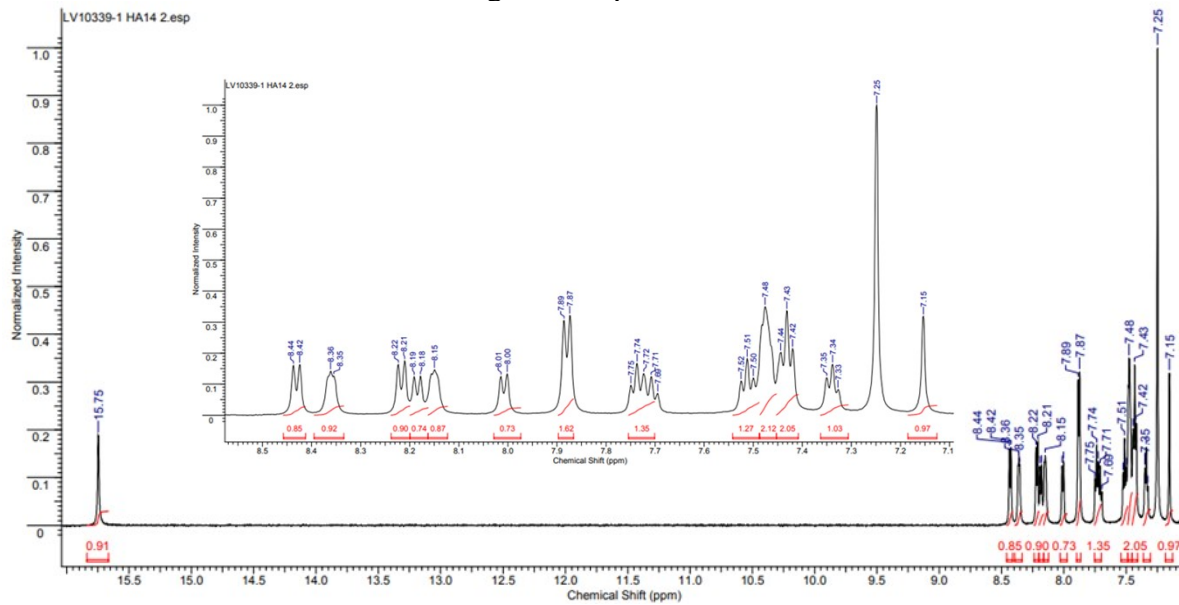

Fig 8S. <sup>1</sup>H NMR spectrum of L<sup>4</sup>

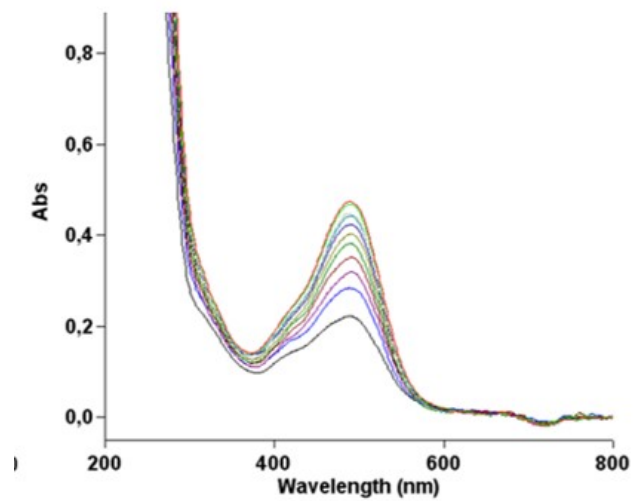

Fig 9S. UV-Vis spectrum of L<sup>4</sup>

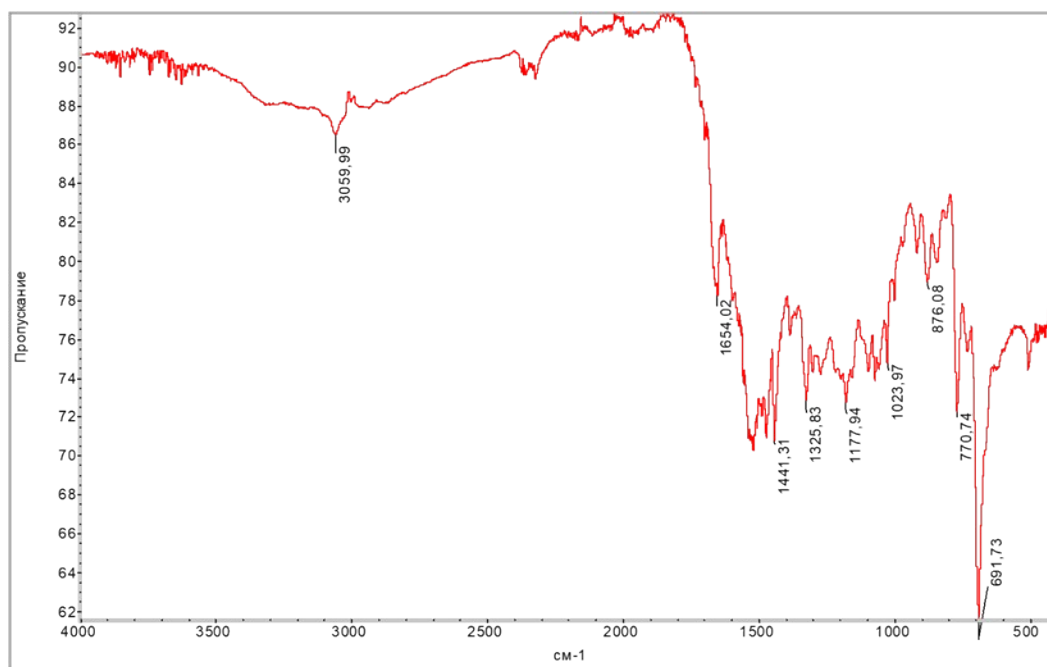

Fig 10S. IR spectrum of L<sup>5</sup>

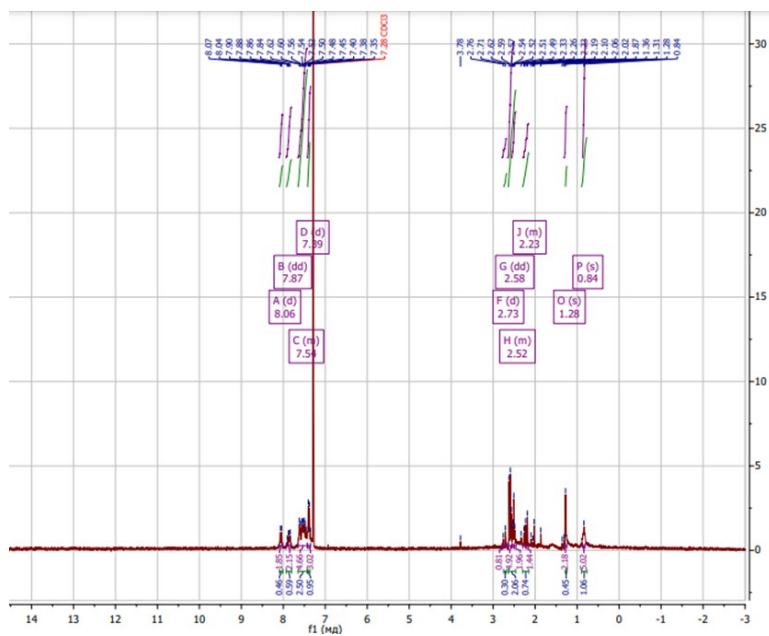

Fig 11S. <sup>1</sup>H NMR spectrum of L<sup>5</sup>

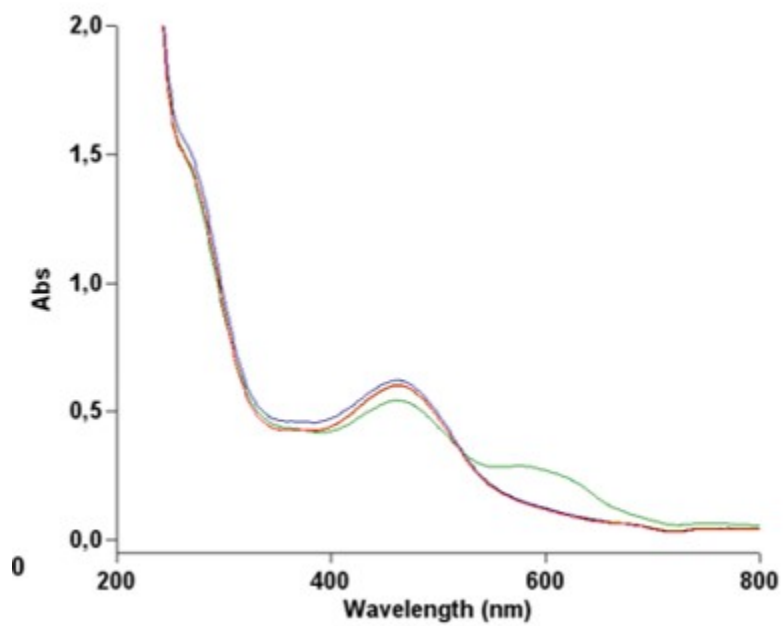

Fig 12S. UV-Vis spectrum of L<sup>5</sup>

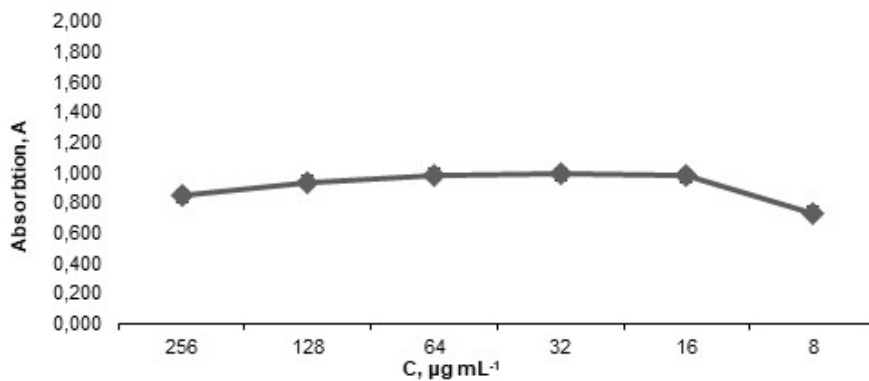

Figure 13S. Change in absorption when L<sup>1</sup> is exposed to the *Escherichia coli* C1 strain at concentrations of 8-256 µg mL<sup>-1</sup> (example of an inactive compound).

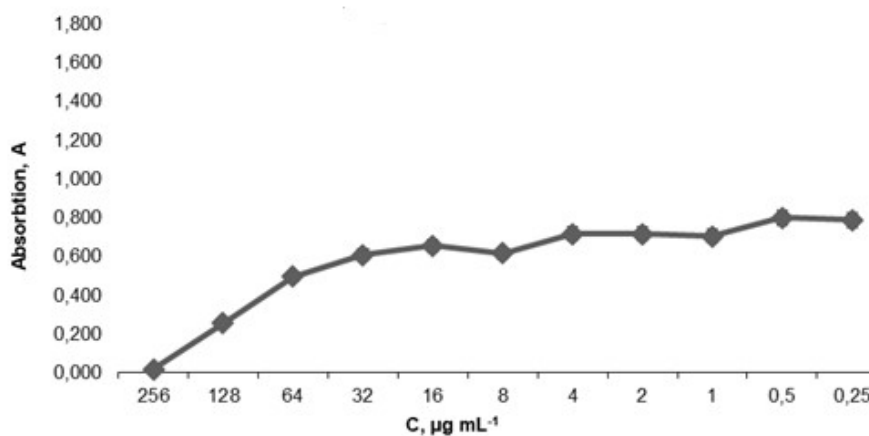

Figure 14S. Change in absorption when L<sup>3</sup> is exposed to the *Escherichia coli* C1 strain at concentrations of 0,25-256 µg mL<sup>-1</sup> (example of an active compound).

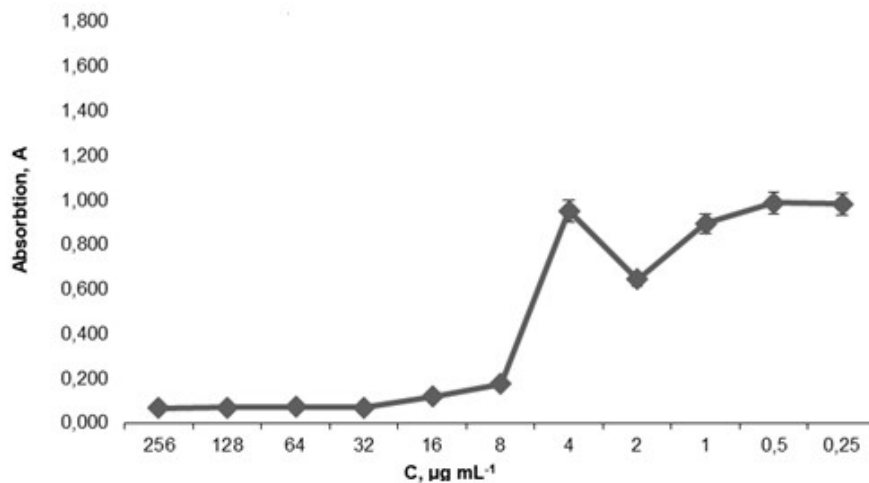

Figure 15S. Change in absorption when L<sup>4</sup> is exposed to the *Staphylococcus aureus* ATCC-25923 strain at concentrations of 0,25-256 µg mL<sup>-1</sup> (example of an active compound).

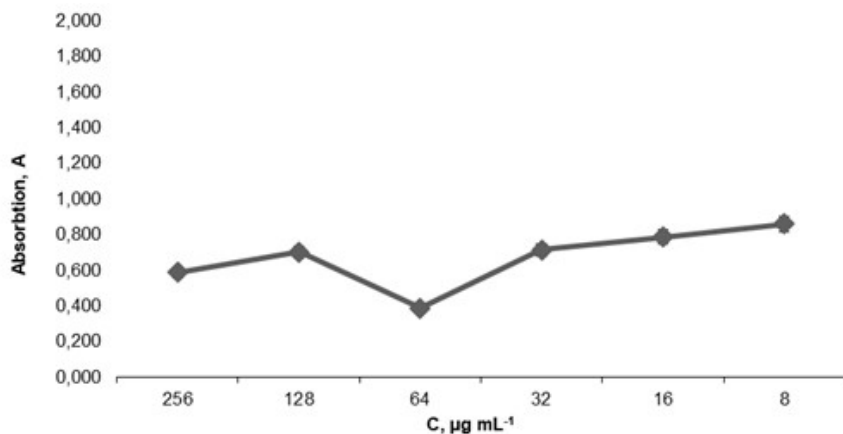

Figure 16S. Change in absorption when L<sup>1</sup> is exposed to the *Staphylococcus aureus* ATCC-25923 strain at concentrations of 8-256 µg mL<sup>-1</sup> (example of an inactive compound).

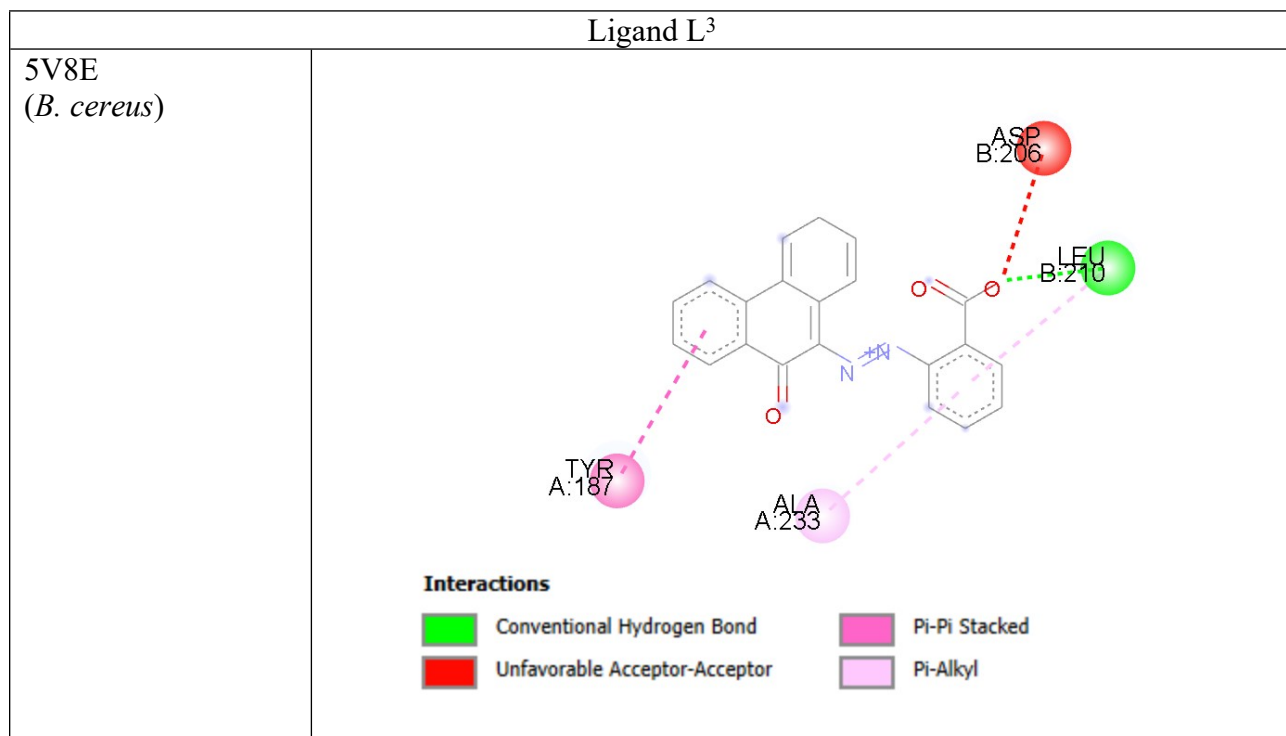

2BL8  
(*E. faecium*)

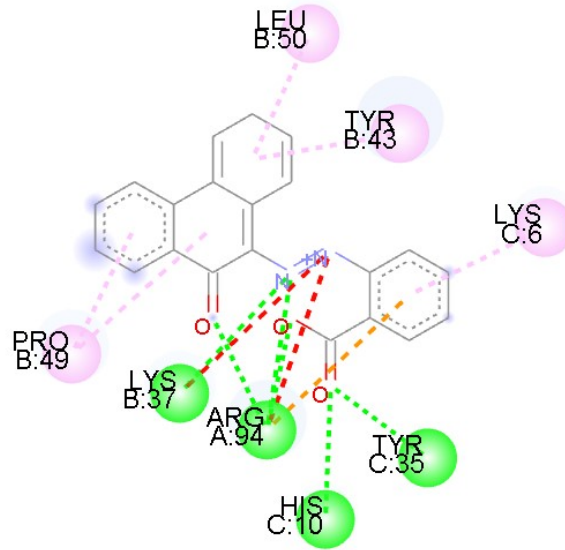

**Interactions**

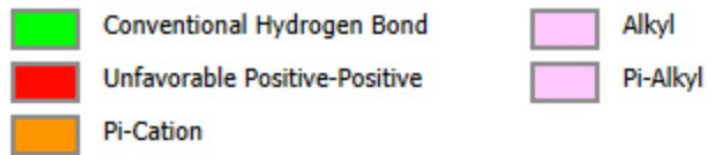

4PRV  
(*E. coli*)

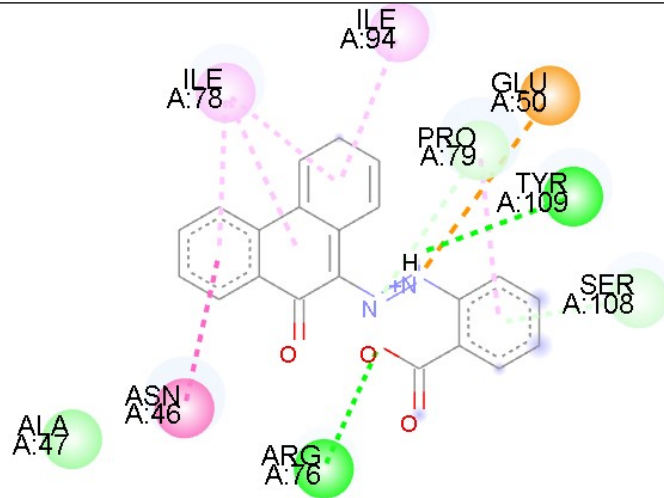

**Interactions**

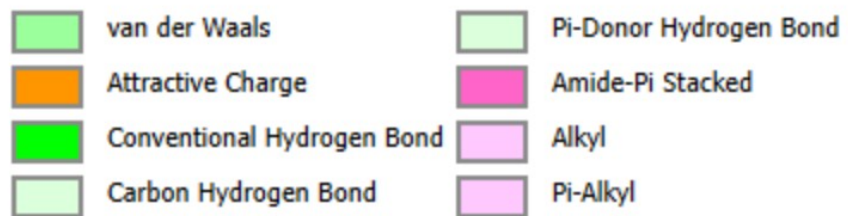

1JIL  
(*S. aureus*)

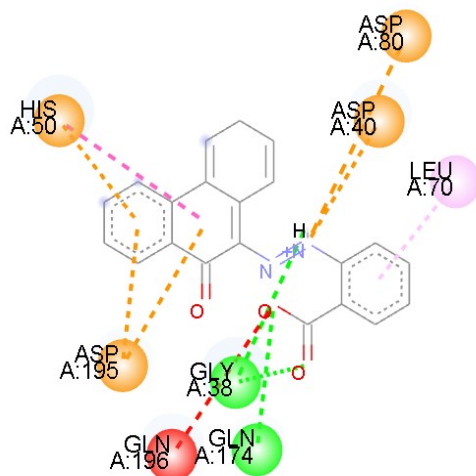

**Interactions**

- |                                                                                   |                               |                                                                                    |               |
|-----------------------------------------------------------------------------------|-------------------------------|------------------------------------------------------------------------------------|---------------|
|  | Attractive Charge             |  | Pi-Anion      |
|  | Conventional Hydrogen Bond    |  | Pi-Pi Stacked |
|  | Unfavorable Acceptor-Acceptor |  | Pi-Alkyl      |
|  | Pi-Cation                     |                                                                                    |               |

1GWE  
(*M. luteus*)

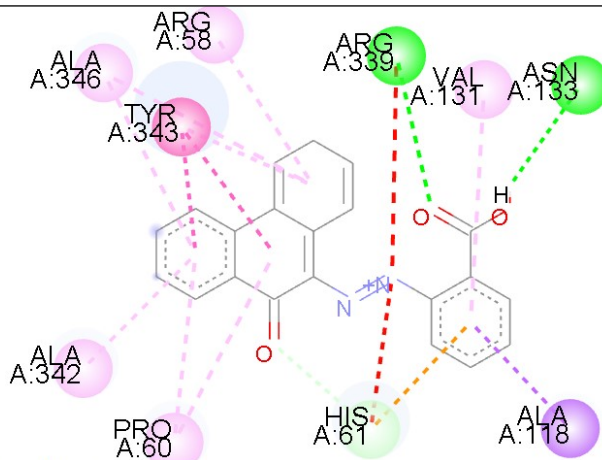

**Interactions**

- |                                                                                     |                               |                                                                                      |               |
|-------------------------------------------------------------------------------------|-------------------------------|--------------------------------------------------------------------------------------|---------------|
|  | Conventional Hydrogen Bond    |  | Pi-Sigma      |
|  | Carbon Hydrogen Bond          |  | Pi-Pi Stacked |
|  | Unfavorable Positive-Positive |  | Alkyl         |
|  | Pi-Cation                     |  | Pi-Alkyl      |

5V00  
(*P. fluorescens*)

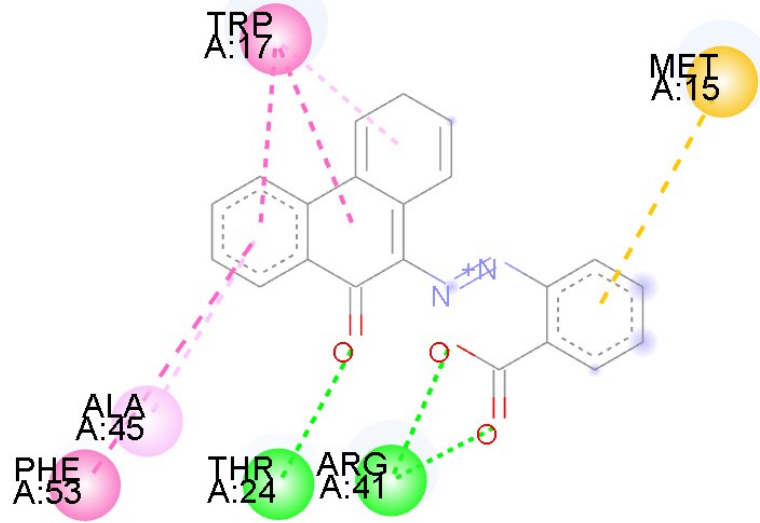

**Interactions**

- Conventional Hydrogen Bond
- Pi-Sulfur
- Pi-Pi Stacked
- Pi-Pi T-shaped
- Pi-Alkyl

L<sup>4</sup>

5V8E  
(*B. cereus*)

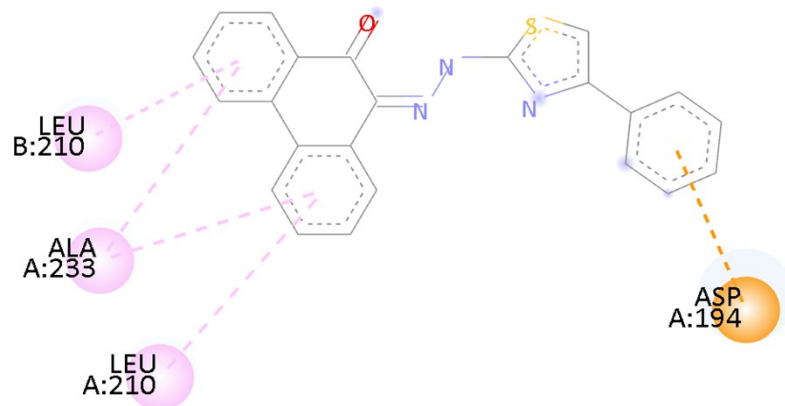

**Interactions**

- Pi-Anion
- Pi-Alkyl

2BL8  
(*E. faecium*)

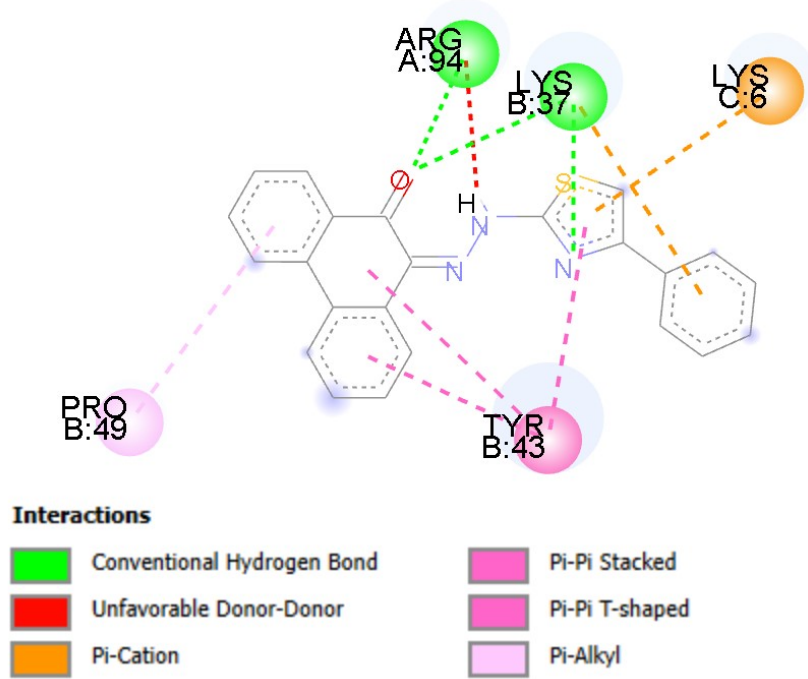

4PRV  
(*E. coli*)

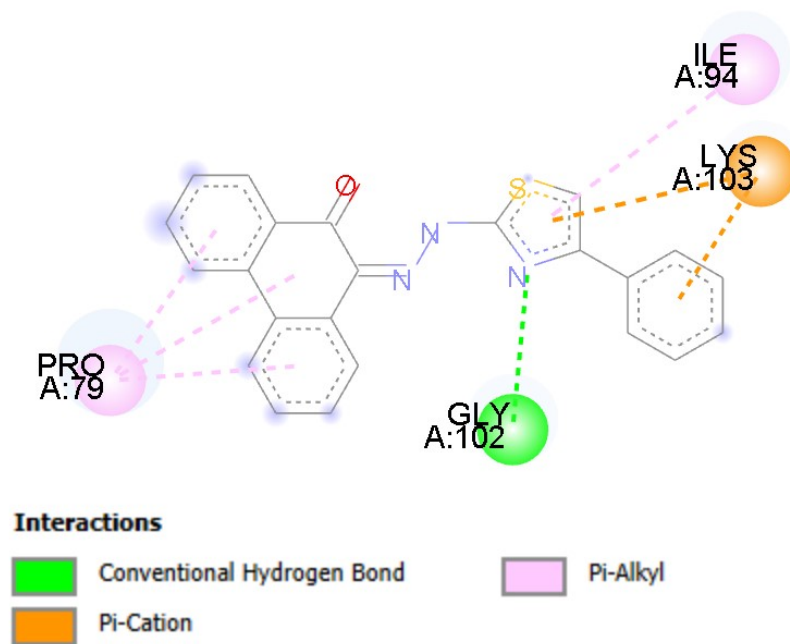

1JIL  
(*S. aureus*)

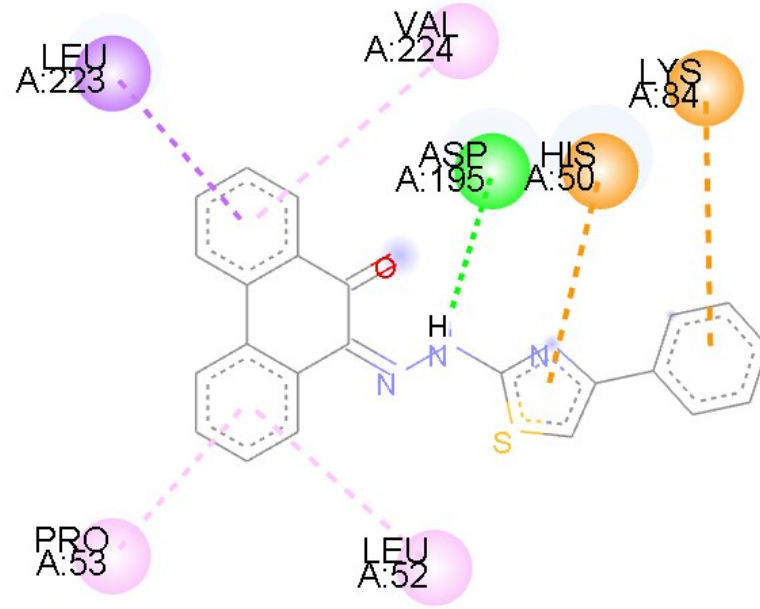

**Interactions**

- |                                                                                                              |                                                                                                    |
|--------------------------------------------------------------------------------------------------------------|----------------------------------------------------------------------------------------------------|
|  Conventional Hydrogen Bond |  Pi-Pi T-shaped |
|  Pi-Cation                |  Pi-Alkyl     |
|  Pi-Sigma                 |                                                                                                    |

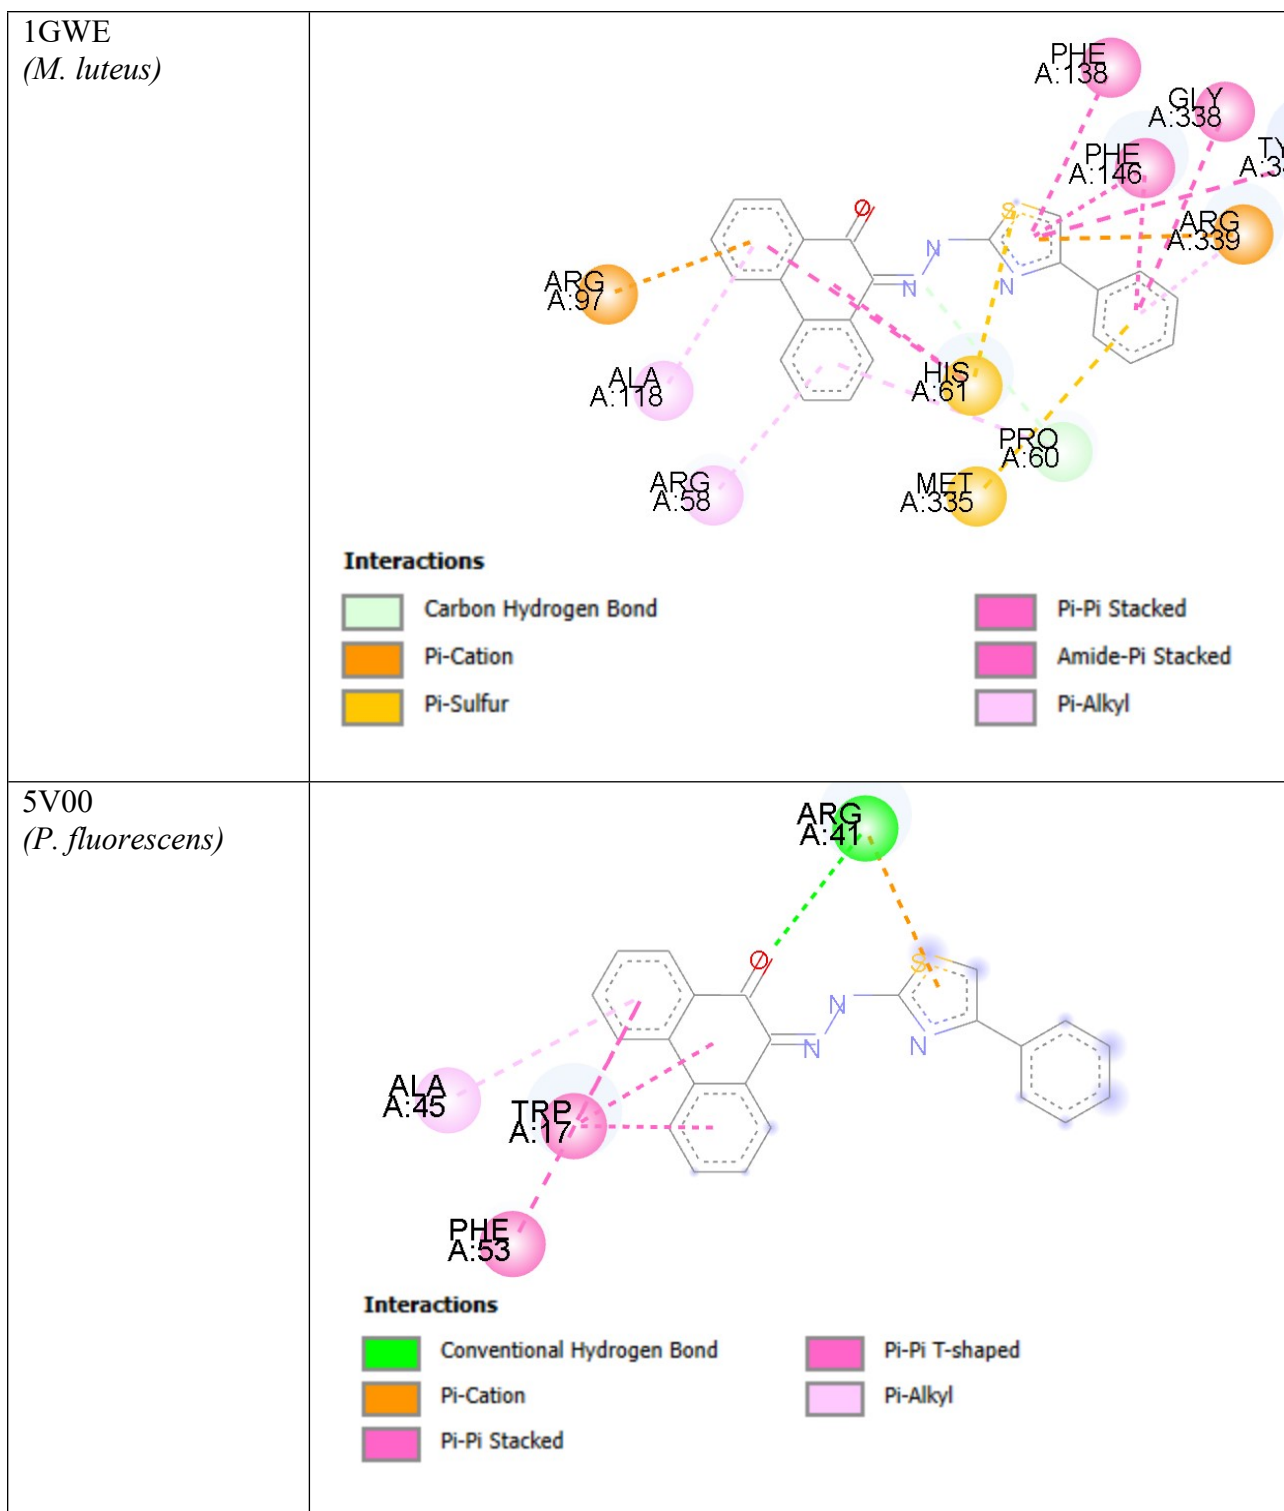

Figure 17S. 2D Chemical Structures representing protein-ligand interactions of L<sup>3</sup> and L<sup>4</sup>

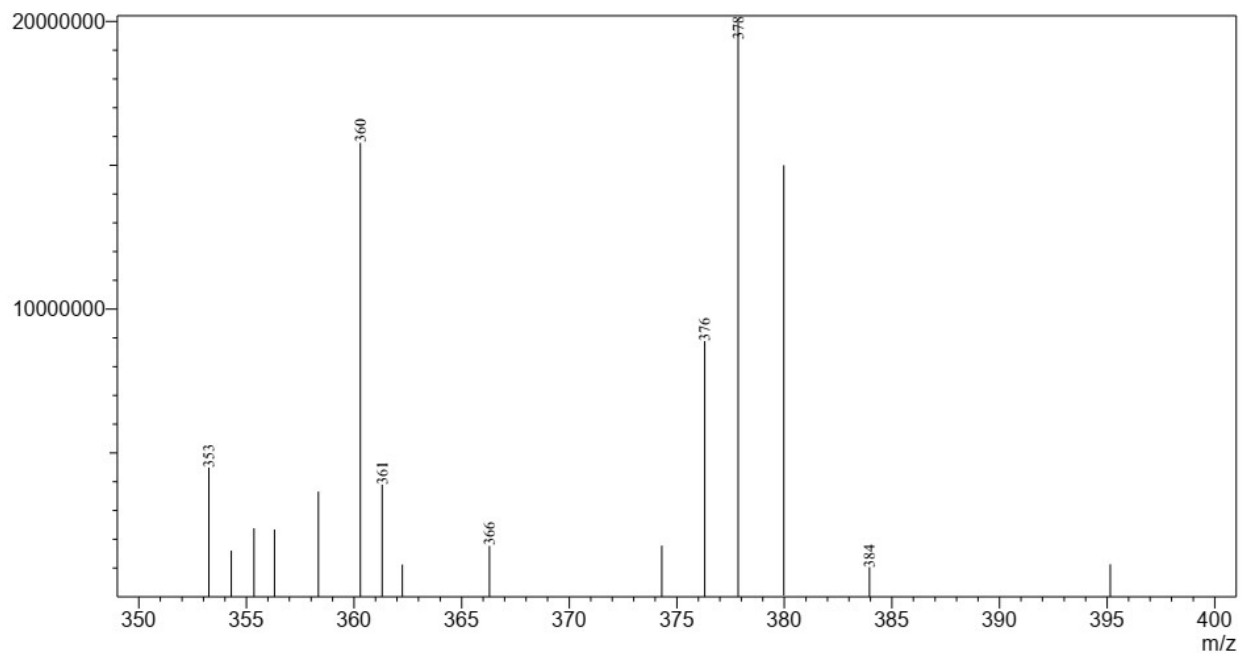

Fig 18S. Mass spectrum of L<sup>1</sup>

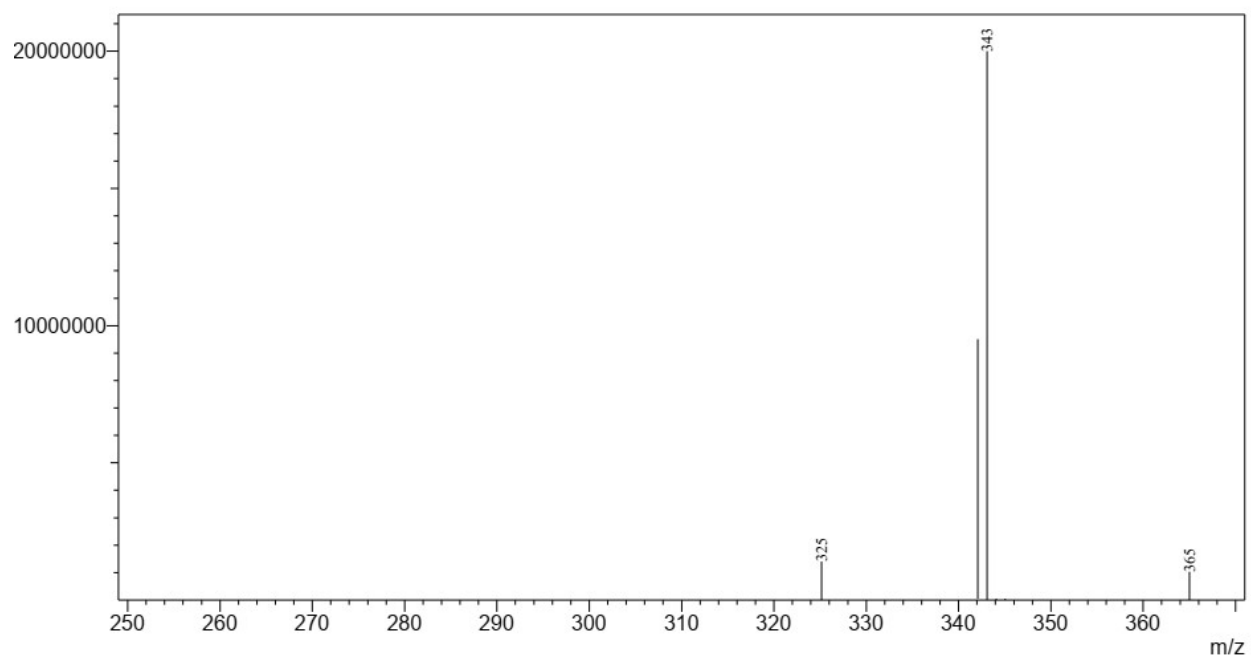

Fig 19S. Mass spectrum of L<sup>3</sup>

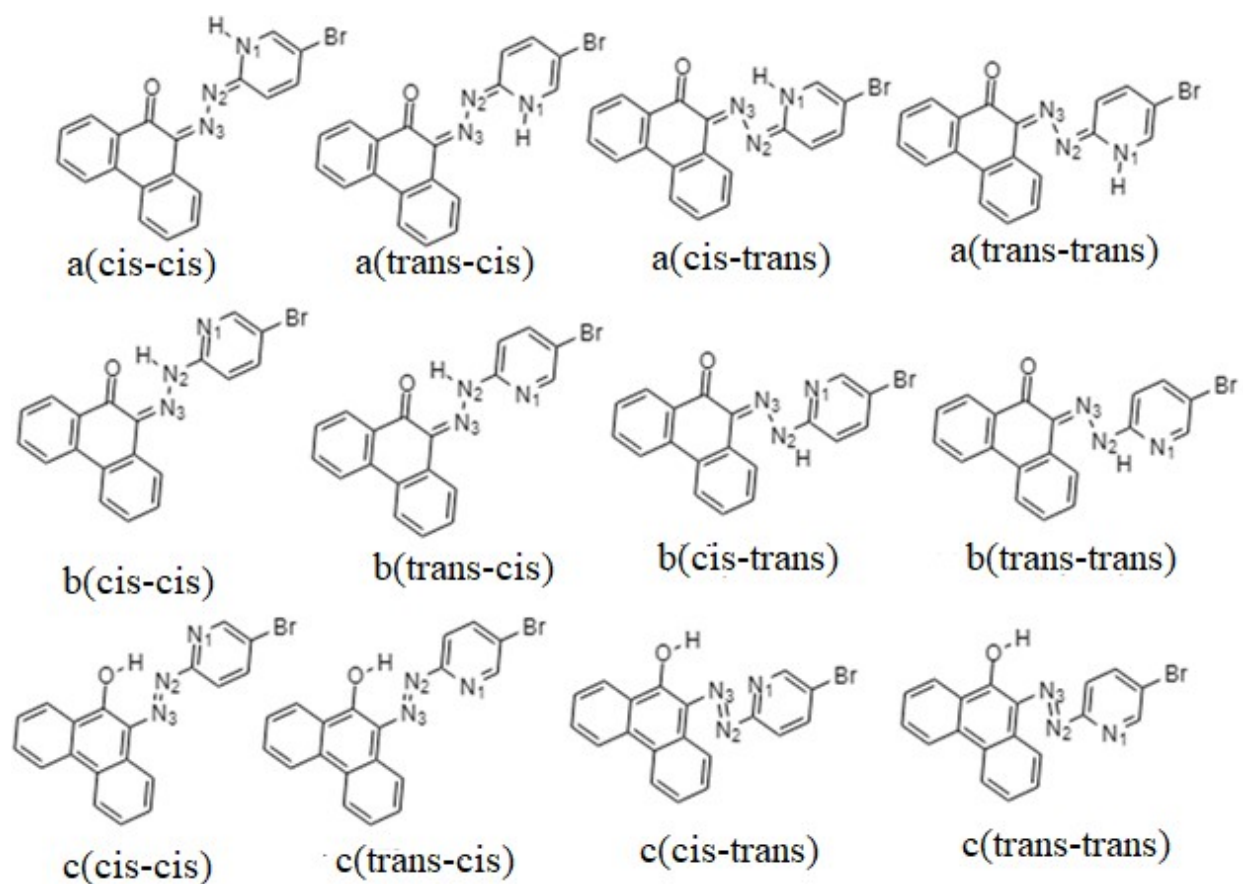

Figure 20S. Possible tautomeric forms of L<sup>1</sup>

Table 1S. Relative energies (kJ/mole) of cis-isomers of zwitter-ionic (a), hydrazo (b) and azo (c) forms of L<sup>1</sup>-L<sup>6</sup> according to DFT calculations.

| Tautomer | Compound | L <sup>1</sup> | L <sup>2</sup> | L <sup>3</sup> | L <sup>4</sup> | L <sup>5</sup> | L <sup>6</sup> |
|----------|----------|----------------|----------------|----------------|----------------|----------------|----------------|
| a        |          | 96.5           | 86.34          | —              | 70.86          | 47.47          | 221.01         |
| b        |          | 0              | 0              | 0              | 0              | 9.04           | 0              |
| c        |          | 33.8           | 0              | 31.44          | 24.14          | 0              | 12.51          |

**Table 2S.** Hemolytic activity of L<sup>3</sup> and L<sup>4</sup>.

| Compound       | HC <sub>50</sub> , µg mL <sup>-1</sup><br>RBC |
|----------------|-----------------------------------------------|
| L <sup>3</sup> | >32                                           |
| L <sup>4</sup> | >32                                           |

**Table 3S.** The crystal data and structure refinement of L<sup>2</sup> and L<sup>4</sup>.

| Compound                                    | L <sup>2</sup>                                     | L <sup>4</sup>                                    |
|---------------------------------------------|----------------------------------------------------|---------------------------------------------------|
| Empirical formula                           | C <sub>18</sub> H <sub>11</sub> ClN <sub>4</sub> O | C <sub>23</sub> H <sub>15</sub> N <sub>3</sub> OS |
| Formula weight                              | 334.76                                             | 381.44                                            |
| T(K)                                        | 100(2)                                             | 100(2)                                            |
| λ (Å)                                       | 1.54184                                            | 1.54184                                           |
| Crystal system                              | orthorhombic                                       | monoclinic                                        |
| Space group                                 | <i>Pna</i> 2 <sub>1</sub>                          | <i>P</i> 2 <sub>1</sub> / <i>c</i>                |
| Unit cell dimensions:                       |                                                    |                                                   |
| a, Å                                        | 16.4130(11)                                        | 20.2762(5)                                        |
| b, Å                                        | 22.3174(14)                                        | 5.30357(13)                                       |
| c, Å                                        | 3.9518(2)                                          | 16.5308(4)                                        |
| α, deg.                                     | 90                                                 | 90                                                |
| β, deg.                                     | 90                                                 | 104.649(2)                                        |
| γ, deg.                                     | 90                                                 | 90                                                |
| V, Å <sup>3</sup>                           | 1447.53(15)                                        | 1719.87(7)                                        |
| Z                                           | 4                                                  | 4                                                 |
| D <sub>calc</sub> (g cm <sup>-3</sup> )     | 1.536                                              | 1.473                                             |
| Absorption coefficient, µ, mm <sup>-1</sup> | 2.449                                              | 1.830                                             |
| F(000)                                      | 688                                                | 792                                               |
| Crystal shape                               | needle                                             | plate                                             |
| Crystal color                               | light-yellow                                       | dark-red                                          |
| Crystal size, mm                            | 0.53×0.04×0.02                                     | 0.12×0.12×0.02                                    |
| Theta range for data collection             | 3.343–79.337                                       | 2.252–80.128                                      |
| Index ranges                                | -20 ≤ h ≤ 19;                                      | -25 ≤ h ≤ 24;                                     |

|                                      |                |                |
|--------------------------------------|----------------|----------------|
|                                      | -28 ≤ k ≤ 24;  | -6 ≤ k ≤ 6;    |
|                                      | -4 ≤ l ≤ 5     | -21 ≤ l ≤ 20   |
| Reflections collected                | 10280          | 41624          |
| Independent reflections              | 2709           | 3593           |
| Reflections collected with I > 2σ(I) | 2249           | 3412           |
| Absorption correction                | Gaussian       | Multi-scan     |
| $T_{\min} / T_{\max}$                | 0.392 / 1.000  | 0.575 / 1.000  |
| Data / restraints / parameters       | 2709 / 1 / 220 | 3593 / 0 / 258 |
| Goodness-of-fit (GOF) on $F^2$       | 1.033          | 1.020          |
| R <sub>1</sub> [I > 2σ(I)]           | 0.0836         | 0.1020         |
| wR <sub>2</sub> [all data]           | 0.2133         | 0.2271         |
| Largest dif. peak and hole           | 1.195 / -0.707 | 0.914 / -0.693 |
| CCDC No                              | 2482127        | 2482128        |

---
